# Supplementary material for: Genome-wide identification of calcium-dependent protein kinases in soybean and analyses of their transcriptional responses to insect herbivory and drought stress
Source: PubMed Central journal article supplement (PMC4702179; doi:10.1038/srep18973), 2016-01-06
Supplement: srep18973-s1.pdf [file srep18973-s1.pdf]

## **Supplementary Figures and Tables**

### **Genome-wide identification of calcium-dependent protein kinases in soybean and analyses of their transcriptional responses to insect herbivory**

Christian Hettenhausen, Guiling Sun, Yanbiao He, Huifu Zhuang, Ting Sun, Jinfeng Qi, and

Jianqiang Wu

Department of Economic Plants and Biotechnology, Kunming Institute of Botany, Chinese Academy of Sciences, Kunming 650201, China

Yunnan Key Laboratory for Wild Plant Resources, Kunming Institute of Botany, Chinese Academy of Sciences, Kunming 650201, China

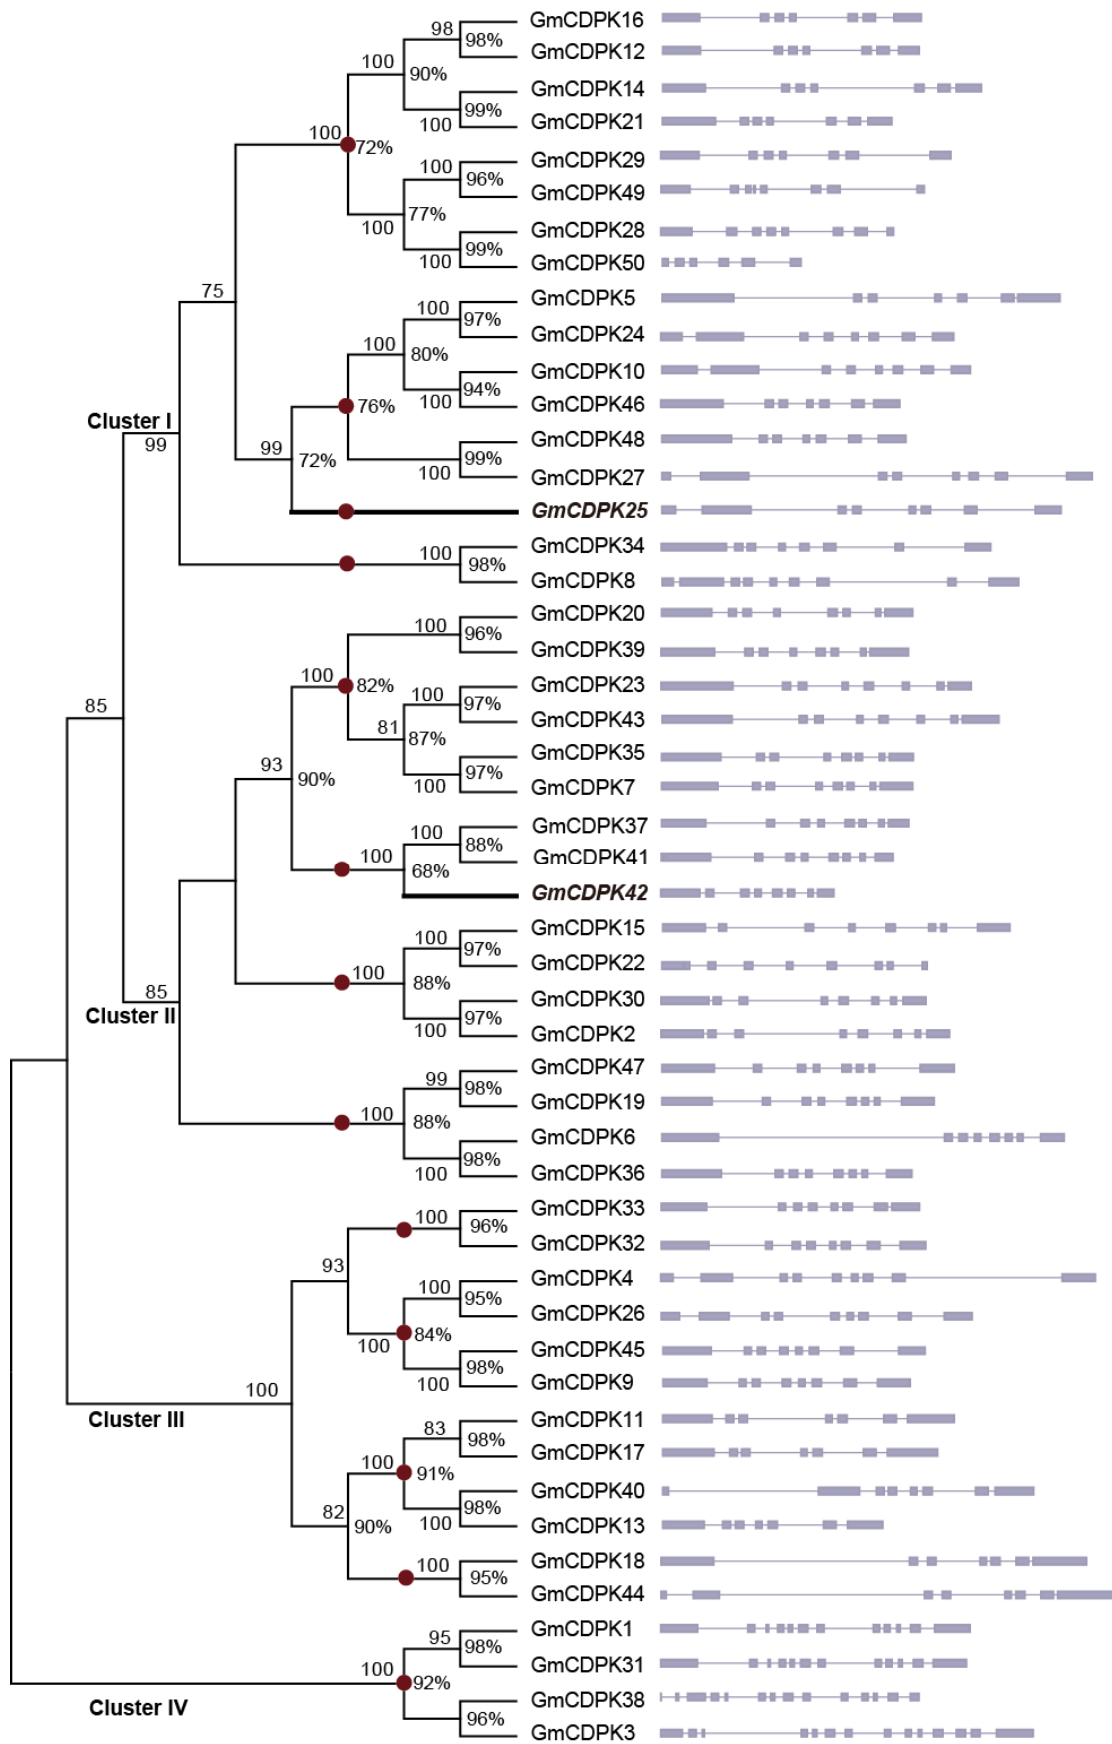

**Supplementary Figure S1. The phylogeny and gene structures of GmCDPKs.**

A maximum likelihood tree of all 50 GmCDPKs was constructed and is shown on the left.

The 4 Clusters (I-IV) are indicated at the branches. Numbers above or below branches show bootstrap support values of maximum likelihood analyses. The percentage numbers show the lowest sequence identity values among the homologs. The branches/nodes for GmCDPK25 and GmCDPK42 that potentially lost their paralogous counterparts are marked in bold and italic. Thirteen internal branches are highlighted with brown dots to mark the positions of the ancestral CDPKs that existed before the split of eudicots and monocots. The corresponding gene structure for each *GmCDPK* is shown at the right of their sequence IDs, with boxes and lines indicating exons and introns, respectively. The sizes of exons and introns are proportional to their sequence lengths.

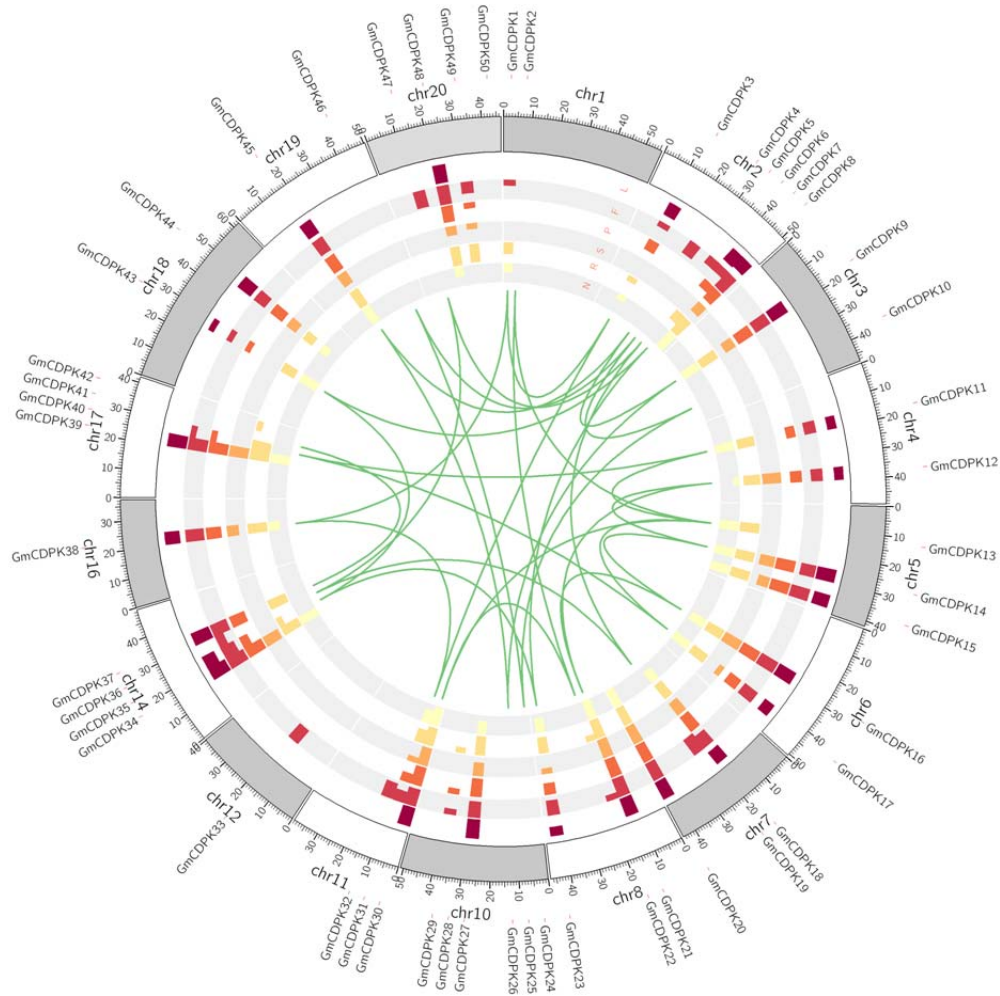

**Supplementary Fig. S2. *GmCDPKs*' Chromosome distribution, development-related expression profile, and paralogous relationships resulted from the early legume genome duplication event.**

The distribution of *GmCDPK* genes on the 17 soybean chromosomes are given in the outer circle, where the numbers represent the chromosome length in Mb. *GmCDPKs*' expression levels in 6 different tissues and developmental stages are displayed as filled blocks in yellow to dark red, with the block height proportional to the expression level ( $\log_{10}$  transformed) (L, young leaves (0.4 Leaflets unfurled); F, flowers; P, one cm pods; S, seeds 14 days after

flowering; R, roots; N, nodules). Gene pairs with sequence identities less than 94%, which probably derived from the early genome duplication in legume, are depicted by arcs in the inner circle. The location of GmCDPK genes in the chromosomes is disproportional to the real for the convenience of display.

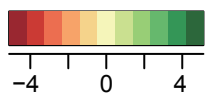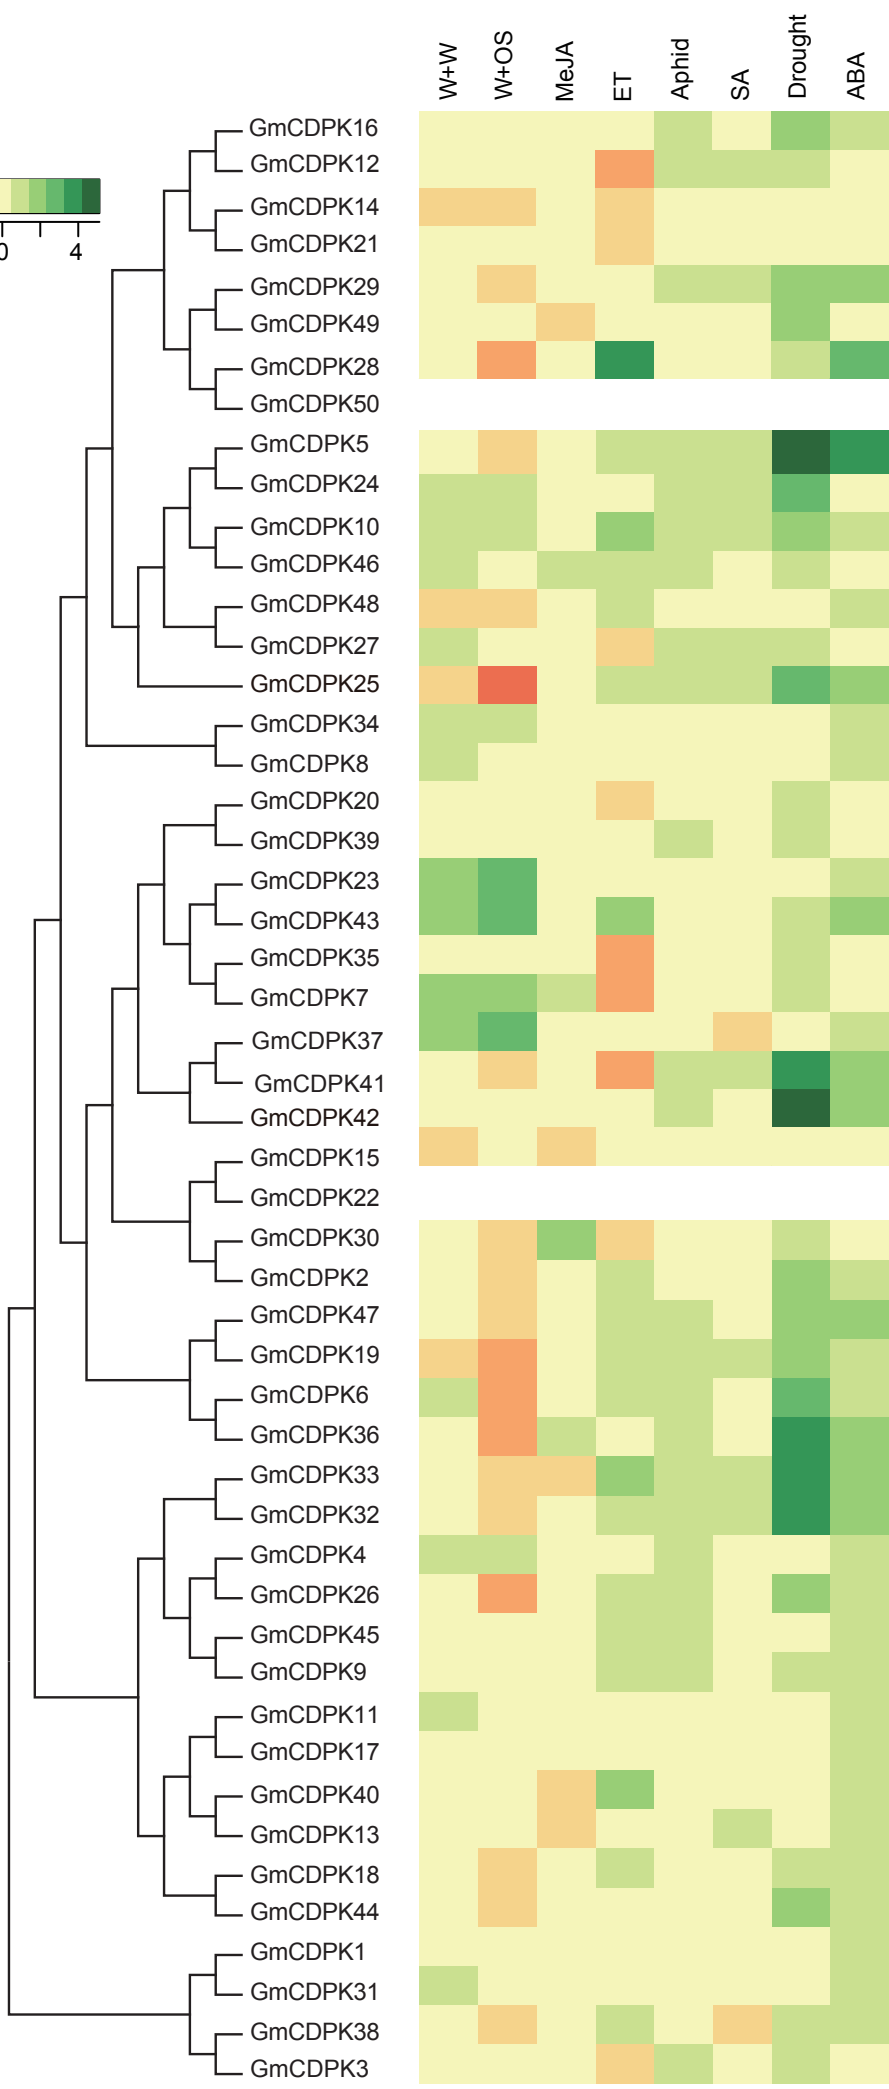

**Supplementary Fig. S3. *GmCDPK* expression profiles across different treatments.**

A maximum likelihood tree of all 50 *GmCDPK*s was constructed and is displayed at the left.

The heat-map on the right shows LOG<sub>2</sub>-transformed *GmCDPK* expression levels in leaves subjected to 8 different treatments. The truncated and the putatively pseudogenized

*GmCDPK22* and *GmCDPK50* were excluded from the analysis.

**Supplementary Table S1 Characteristics of the soybean GmCDPKs**

| Name       | Phytozome ID    | PACID    | Introns | cDNA length | Amino acids | M.W. (kDa) | No. of EF hands | Amino acids at N-terminus | M-Myrist | N-Palmit <sup>#</sup> | Subcellular localization |
|------------|-----------------|----------|---------|-------------|-------------|------------|-----------------|---------------------------|----------|-----------------------|--------------------------|
| GmCDPK1.1  | Glyma01g37100.1 | 26325114 | 11      | 2456        | 562         | 63.7       | 4               | MGLCFSST                  | Yes      | 4,31                  | Cp                       |
| GmCDPK1.2  | Glyma01g37100.2 | 26325115 | 10      | 2724        | 519         | 58.9       | 3               | MGLCFSST                  | Yes      | 4,31                  | Cp                       |
| GmCDPK2    | Glyma01g43241.1 | 26323834 | 7       | 1999        | 542         | 61.6       | 4               | MRQKPNVR                  | Yes      | No                    | -                        |
| GmCDPK3    | Glyma02g05440.1 | 26289399 | 13      | 2522        | 530         | 60.1       | 4               | MGACFSAT                  | Yes      | 4                     | Cp                       |
| GmCDPK4.1  | Glyma02g31490.1 | 26287928 | 8       | 2348        | 525         | 60.0       | 4               | MGNCCVLP                  | Yes      | 4,5                   | -                        |
| GmCDPK4.2* | Glyma02g31490.2 | 26287929 | 8       | 2223        | 426         | 48.5       | 4               | MRHLPKHP                  | No       | No                    | -                        |
| GmCDPK5    | Glyma02g34890.1 | 26288903 | 7       | 2448        | 587         | 65.6       | 4               | MGNNCVGS                  | Yes      | 5                     | Cp                       |
| GmCDPK6    | Glyma02g44720.1 | 26287639 | 7       | 2292        | 527         | 58.7       | 4               | MGNCCSGG                  | Yes      | 4,5                   | -                        |
| GmCDPK7    | Glyma02g46070.1 | 26288212 | 7       | 2447        | 528         | 59.5       | 4               | MGCCMSKK                  | Yes      | 3,4                   | -                        |
| GmCDPK8    | Glyma02g48160.1 | 26288759 | 8       | 2507        | 549         | 61.5       | 4               | MGNTCRGS                  | Yes      | 5                     | -                        |
| GmCDPK9.1  | Glyma03g29450.1 | 26334057 | 7       | 2344        | 534         | 60.1       | 4               | MGNCCATP                  | Yes      | 4,5                   | -                        |
| GmCDPK9.2  | Glyma03g29450.2 | 26334058 | 6       | 1977        | 497         | 55.7       | 3               | MGNCCATP                  | Yes      | 4,5                   | -                        |
| GmCDPK10   | Glyma03g36240.2 | 26335659 | 6       | 2429        | 590         | 66.5       | 4               | MMGNNCVG                  | Yes      | 6                     | -                        |
| GmCDPK11   | Glyma04g34440.1 | 26304777 | 6       | 2581        | 556         | 62.9       | 4               | MGNCNACA                  | Yes      | 4,7                   | -                        |
| GmCDPK12   | Glyma04g38150.1 | 26305524 | 6       | 1877        | 496         | 55.9       | 4               | MAKPHSGT                  | No       | No                    | -                        |



|            |                 |          |   |      |     |      |   |          |     |     |    |
|------------|-----------------|----------|---|------|-----|------|---|----------|-----|-----|----|
| GmCDPK13   | Glyma05g01470.1 | 26321134 | 6 | 2219 | 539 | 61.1 | 4 | MGNCNACV | Yes | 4   | -  |
| GmCDPK14   | Glyma05g33240.1 | 26322379 | 6 | 2061 | 507 | 57.1 | 4 | MAAKSSSS | No  | 50  | -  |
| GmCDPK15   | Glyma05g37260.1 | 26320132 | 7 | 2194 | 518 | 58.3 | 4 | MGNCSSGA | Yes | 4   | Cp |
| GmCDPK16   | Glyma06g16920.1 | 26299165 | 6 | 1993 | 497 | 56.0 | 4 | MSNSTTGT | No  | 48  | -  |
| GmCDPK17   | Glyma06g20170.1 | 26301340 | 6 | 2675 | 551 | 62.5 | 4 | MGNCNVCA | Yes | 4,7 | -  |
| GmCDPK18   | Glyma07g18310.1 | 26348115 | 6 | 2771 | 533 | 59.7 | 4 | MGNCCRSP | Yes | 4,5 | -  |
| GmCDPK19   | Glyma07g36000.1 | 26349024 | 7 | 2339 | 541 | 60.3 | 4 | MGNCCSQG | Yes | 4,5 | -  |
| GmCDPK20   | Glyma07g39010.1 | 26348563 | 7 | 2250 | 529 | 58.7 | 4 | MGCHGSKE | Yes | 3   | -  |
| GmCDPK21   | Glyma08g00840.1 | 26309927 | 6 | 2223 | 508 | 57.2 | 4 | MAAKSSSS | No  | 51  | -  |
| GmCDPK22*  | Glyma08g02300.2 | 26310846 | 8 | 1377 | 458 | 52.1 | 4 | PPATSSLG | No  | No  | -  |
| GmCDPK23   | Glyma08g42850.1 | 26309785 | 7 | 2582 | 551 | 61.8 | 4 | MGCCASKE | Yes | 3,4 | -  |
| GmCDPK24   | Glyma10g10501.1 | 26346648 | 7 | 2677 | 592 | 66.2 | 4 | MGNNCVGS | Yes | 5   | Cp |
| GmCDPK25   | Glyma10g11020.1 | 26346495 | 6 | 2911 | 595 | 65.8 | 4 | MGNNCVGP | Yes | 5   | -  |
| GmCDPK26.1 | Glyma10g17561.1 | 26346683 | 8 | 2329 | 528 | 60.2 | 4 | MGNCCVVP | Yes | 4,5 | -  |
| GmCDPK26.2 | Glyma10g17561.2 | 26346684 | 8 | 2436 | 528 | 60.2 | 4 | MGNCCVVP | Yes | 4,5 | -  |
| GmCDPK27.1 | Glyma10g23620.2 | 26346632 | 7 | 2426 | 581 | 65.0 | 4 | MGNTCVGP | Yes | 5   | -  |
| GmCDPK27.2 | Glyma10g23620.3 | 26346633 | 6 | 2669 | 581 | 65.0 | 4 | MGNTCVGP | Yes | 5   | -  |
| GmCDPK28   | Glyma10g36090.2 | 26344103 | 7 | 1677 | 558 | 63.5 | 4 | MYTSLEIL | No  | 55  | -  |
| GmCDPK29   | Glyma10g36100.1 | 26345626 | 6 | 1893 | 492 | 55.3 | 4 | MQKHGFAS | No  | No  | Mt |

|            |                 |          |    |      |     |      |   |          |     |       |     |
|------------|-----------------|----------|----|------|-----|------|---|----------|-----|-------|-----|
| GmCDPK30   | Glyma11g02260.1 | 26297855 | 7  | 2109 | 505 | 57.1 | 4 | MGNCNSEP | Yes | 4     | Cp  |
| GmCDPK31   | Glyma11g08180.1 | 26297646 | 11 | 2413 | 562 | 63.5 | 4 | MGICFSAT | Yes | 4     | Cp  |
| GmCDPK32   | Glyma11g13740.1 | 26296164 | 7  | 2287 | 542 | 61.7 | 4 | MGSCISTQ | Yes | 4     | Cp  |
| GmCDPK33   | Glyma12g05730.1 | 26294512 | 7  | 2282 | 533 | 60.6 | 4 | MGSCISTQ | Yes | 4     | Cp  |
| GmCDPK34.1 | Glyma14g00320.1 | 26285999 | 7  | 2622 | 558 | 62.7 | 4 | MGNTCRGS | Yes | 5     | -   |
| GmCDPK34.2 | Glyma14g00320.2 | 26285997 | 8  | 2571 | 558 | 62.7 | 4 | MGNTCRGS | Yes | 5     | -   |
| GmCDPK34.3 | Glyma14g00320.3 | 26285998 | 8  | 2558 | 558 | 62.7 | 4 | MGNTCRGS | Yes | 5     | -   |
| GmCDPK35.1 | Glyma14g02680.1 | 26286688 | 7  | 2344 | 539 | 60.7 | 4 | MGCCLSKK | Yes | 3,4   | -   |
| GmCDPK35.2 | Glyma14g02680.2 | 26286689 | 4  | 1697 | 443 | 49.5 | 1 | MGCCLSKK | Yes | 3,4   | -   |
| GmCDPK36   | Glyma14g04010.1 | 26285792 | 7  | 2374 | 529 | 59.0 | 4 | MGNCCSGG | Yes | 4,5   | -   |
| GmCDPK37.1 | Glyma14g40090.1 | 26286236 | 7  | 1943 | 526 | 59.4 | 4 | MGLGMFKA | No  | 11,12 | -   |
| GmCDPK37.2 | Glyma14g40090.2 | 26286235 | 7  | 1998 | 537 | 61.0 | 4 | MGHCFSKP | Yes | 4     | Nuc |
| GmCDPK38   | Glyma16g23870.3 | 26352812 | 13 | 1665 | 554 | 62.8 | 4 | MSREGYHP | Yes | 30    | Cp  |
| GmCDPK39   | Glyma17g01730.1 | 26313594 | 7  | 2506 | 538 | 59.8 | 4 | MGCQGSKE | Yes | 3     | -   |
| GmCDPK40   | Glyma17g10410.1 | 26314025 | 7  | 2386 | 541 | 61.4 | 4 | MGNCNACV | Yes | 4,7   | -   |
| GmCDPK41   | Glyma17g38040.1 | 26311092 | 8  | 2017 | 583 | 66.9 | 4 | MILFFVSE | Yes | 67    | Nuc |
| GmCDPK42   | Glyma17g38050.2 | 26312864 | 7  | 1825 | 513 | 58.3 | 4 | MKMGVGFS | No  | 56    | -   |
| GmCDPK43.1 | Glyma18g11030.1 | 26355363 | 7  | 2789 | 551 | 61.9 | 4 | MGCCVSKD | Yes | 3,4   | -   |
| GmCDPK43.2 | Glyma18g11030.2 | 26355362 | 8  | 2729 | 551 | 61.9 | 4 | MGCCVSKD | Yes | 3,4   | -   |

|            |                 |          |   |      |     |      |   |          |     |     |    |
|------------|-----------------|----------|---|------|-----|------|---|----------|-----|-----|----|
| GmCDPK43.3 | Glyma18g11030.3 | 26355364 | 8 | 2713 | 551 | 61.9 | 4 | MGCCVSKD | Yes | 3,4 | -  |
| GmCDPK44   | Glyma18g43160.1 | 26356996 | 7 | 2493 | 512 | 57.9 | 4 | MGNCCRSP | Yes | 4,5 | -  |
| GmCDPK45   | Glyma19g32260.1 | 26327943 | 7 | 2310 | 535 | 60.3 | 4 | MGNCCATP | Yes | 4,5 | -  |
| GmCDPK46.1 | Glyma19g38890.1 | 26327776 | 5 | 2280 | 560 | 63.3 | 3 | MMGNNCLG | No  | 6   | -  |
| GmCDPK46.2 | Glyma19g38890.2 | 26327775 | 6 | 2600 | 593 | 67.0 | 4 | MMGNNCLG | No  | 6   | -  |
| GmCDPK47   | Glyma20g08140.1 | 26337815 | 7 | 2403 | 546 | 60.9 | 4 | MGNCCSQG | Yes | 4,5 | -  |
| GmCDPK48.1 | Glyma20g17020.1 | 26337739 | 7 | 2322 | 579 | 65.0 | 4 | MGNTCVGP | Yes | 5   | -  |
| GmCDPK48.2 | Glyma20g17020.2 | 26337738 | 7 | 2400 | 579 | 65.0 | 4 | MGNTCVGP | Yes | 5   | -  |
| GmCDPK49   | Glyma20g31510.1 | 26338820 | 7 | 1443 | 480 | 54.0 | 4 | MQKHGFAS | No  | No  | Mt |
| GmCDPK50*  | Glyma20g31520.2 | 26337349 | 5 | 966  | 294 | 33.1 | 4 | MAPEVLRK | No  | No  | -  |

“\*” indicates that the 5’ terminus of the sequence is incomplete. “#” indicates the predicted amino acid sites of palmitoylation in the N-terminal region. Subcellular localization was predicted for the localization in chloroplasts (Cp), mitochondria (Mt), and the nucleus (Nuc).

**Supplementary Table S2 Gene IDs for CDPK genes in *Medicago truncatula* and *Lotus japonicus*.**

The annotated proteins of two other legume species, *Medicago truncatula* and *Lotus japonicas*, were retrieved from Phytozome 10 database (<http://phytozome.jgi.doe.gov>) and Kazusa DNA Research Institute (<ftp://ftp.kazusa.or.jp/pub/lotus/>), respectively.

| <i>Medicago truncatula</i> |            | <i>Lotus japonicus</i> |            |
|----------------------------|------------|------------------------|------------|
| Gene ID                    | CDPK Names | Gene ID                | CDPK Names |
| Medtr3g098070.1            | MtCDPK1    | chr4.CM0004.1050.r2.a  | LjCDPK1    |
| Medtr3g051770.1            | MtCDPK2    | chr4.CM0026.550.r2.m   | LjCDPK2    |
| Medtr3g098090.1            | MtCDPK3    | chr1.CM0029.690.r2.d   | LjCDPK3    |
| Medtr8g099095.1            | MtCDPK4    | chr1.CM0094.80.r2.m    | LjCDPK4    |
| Medtr8g095440.1            | MtCDPK5    | chr2.CM0102.520.r2.d   | LjCDPK5    |
| Medtr7g068710.1            | MtCDPK6    | chr4.CM0119.200.r2.m   | LjCDPK6    |
| Medtr7g091890.1            | MtCDPK7    | chr2.CM0308.470.r2.m   | LjCDPK7    |
| Medtr7g106710.1            | MtCDPK8    | chr6.CM0489.230.r2.d   | LjCDPK8    |
| Medtr5g009830.1            | MtCDPK9    | chr6.CM0553.410.r2.d   | LjCDPK9    |
| Medtr5g092810.1            | MtCDPK10   | chr1.LjT08C17.20.r2.m  | LjCDPK10   |
| Medtr5g089320.1            | MtCDPK11   | chr5.LjT12G17.60.r2.m  | LjCDPK11   |
| Medtr5g089440.1            | MtCDPK12   | chr4.LjT12N18.80.r2.d  | LjCDPK12   |
| Medtr5g099240.1            | MtCDPK13   | chr5.LjT34O04.70.r2.d  | LjCDPK13   |
| Medtr5g022030.1            | MtCDPK14   | chr2.LjT42A12.60.r2.m  | LjCDPK14   |
| Medtr0028s0170.1           | MtCDPK15   | LjSGA_022365.1         | LjCDPK15   |
| Medtr1g052530.1            | MtCDPK16   | LjSGA_045515.1         | LjCDPK16   |
| Medtr1g096490.1            | MtCDPK17   | LjSGA_026936.1         | LjCDPK17   |
| Medtr1g041150.1            | MtCDPK18   | LjSGA_029957.1         | LjCDPK18   |
| Medtr1g055255.1            | MtCDPK19   | LjSGA_014141.2         | LjCDPK19   |
| Medtr1g054865.1            | MtCDPK20   |                        |            |
| Medtr1g026190.1            | MtCDPK21   |                        |            |
| Medtr4g107490.1            | MtCDPK22   |                        |            |
| Medtr4g132070.1            | MtCDPK23   |                        |            |
| Medtr4g066660.1            | MtCDPK24   |                        |            |
| Medtr4g132040.1            | MtCDPK25   |                        |            |

**Supplementary Table S3 List of primers used for q-PCR analysis**

| <b>GmCDPK</b> | <b>Forward primer (5'-3')</b> | <b>Reverse primer (5'-3')</b> |
|---------------|-------------------------------|-------------------------------|
| 1             | CATTATTCCTTTGATCTCTCTCCCA     | TTGCGGTTACGGTTGGATGA          |
| 2             | AATGCGTCAAAAACCGAACG          | GAAACGGTGTCTGTTACTGCG         |
| 3             | TGCATCTTTGAGGCGTTTTTCG        | TGCGCTTTTTGTTGACGTTGA         |
| 4             | AGAGCCTTGAGGGTGATTGC          | AACCCTACACGCAGCTCATC          |
| 5             | AGCTGGTACCACAAAGGGTT          | GTGCTGAGACAAGGGCATCA          |
| 6             | ACCCTTCCAATGCGACTCTT          | TGTTTGACGTTGGGAGACGA          |
| 7             | AGTTGACTCGGTTCCACCTT          | GCCAAAGTTTGATGCAGAATGG        |
| 8             | GGCAGGAGAGGAGCCAATAC          | TCTCCGACAGATCTCCACAA          |
| 9             | TGCGAAACAAGTTTGACCCTC         | AGGGTTTTTGGGGATGGATGT         |
| 10            | TCTTCGTCCATTTTCGTTTCCA        | ATTTCTGCACCAACCCCACT          |
| 11            | GCCGGAGAAATCAGAACCCA          | AGGCGTTGCAGTTTCCATA           |
| 12            | ACCGAGTCTTCCTCTGTTTCT         | TGTGAGGCTTCGCCATTGAT          |
| 13            | GCTGCAGGCCTCAAAATGTC          | TCACACCGCCAATGAGACAA          |
| 14            | ATAGCACGCCGAAAAACACG          | GATTCGCCGCCATTGTTGT           |
| 15            | TTGGCTGCAGAGGTACAGAG          | CAACCGCACTTGGGAGACTA          |
| 16            | GCAGGTCTGGGTCTTCTTTT          | TTCTCGGTTCCGGTATGGGAG         |
| 17            | CCGGCGTCACCATACGATAA          | TCTACCACGTCAGCTTTCGC          |
| 18            | ATGCAACACTTCGTTGCGTG          | TGGGTCAAATACCTGAGTCAAATCT     |
| 19            | ACTAATTAATCACCACCCTTCCCA      | AGGGAGGGAGGAAAACCACA          |
| 20            | TGCAAGTGCTTATCGAAGCCT         | GCTTGCACTTCCATATACGGGT        |
| 21            | AGCTCCACGAAGATACCTCCT         | GGGCTGGTCACGTTAGACTT          |
| 23            | TAAAGTATGTGAATGAACTCCACCT     | AAGTGGAGCCTTGAAAGAGGG         |
| 24            | ACAACGTGTTGGATCGAGAACT        | TCCGCAGCTTTGGTTCTCTT          |
| 25            | AGCTTTGGTTTAATGATGTTTCACT     | GCGGCATTGCATCTCATGATT         |
| 26            | AGCTCATCGTGCCTTCCTTTT         | GGTCCGGCTTCTCCTTCTT           |
| 27            | TCTGATTTGACTCTTTTGATGCCA      | GGTGCTAAGTTAGTGAAAAGAACA      |
| 28            | CACGAGACTCCGAACGTGAA          | GCTTCAACAGCTTCGCCTTT          |

|    |                            |                        |
|----|----------------------------|------------------------|
| 29 | AGGAAGGCAATTCAATTCGGA      | GATACGGCAACACGTTACGC   |
| 30 | TGCACGACACCTTATCCATCAA     | CTGCAACTGCTGCTTCTTGC   |
| 31 | TCCTTTGATCTCTCTGCCATTC     | AGACCTTTGCGGTTACGGTT   |
| 32 | GGCCTCTCGCCAGTATTCAA       | AACTGAGAACTTTGGCCCCT   |
| 33 | AGAAAATGGCGGGACCAACT       | AATTGCGAAGAGGGTGATCG   |
| 34 | ACGCCAAGAGAGAAGCCATC       | GGCCCTGTCCAATTTACGA    |
| 35 | CCCACAGTTGACTCGGTTCT       | AGGAGAAGCCAAAGTTTGATGC |
| 36 | ACCTTTGAACTGAGTTGTTCCA     | TTCGGCGAGTCTCTTGCTTT   |
| 37 | AGCTCCGGAGGTGTTAAAGC       | TTCTCTCGTTTTCGCCCCAA   |
| 38 | GTATCATCCGAACCCCGTCC       | CCTTGCGGTTCTTGTTGACG   |
| 39 | TGCACTACCCTTTCCCTTCCT      | AGCAGCAGCTACTGTCCAAG   |
| 40 | ATGCTGCAGGCCTCAAAATG       | AAGTTCGATCACACCGCCAA   |
| 41 | TGAGGACCATCCCATCCCAT       | AGCTTCAGAGTTTGAGAGGTG  |
| 42 | CTGGCATGAAAATGGGAGTGG      | AGTGGAAGTGGAGGTGCAAT   |
| 43 | ATCTTCCACAATCATCCTTGCAT    | GTGGAGCCTTGAAAGAGGGT   |
| 44 | TTCTGGCAGTGCATGAGGTT       | TGCAGTTGCACTCACATTGC   |
| 45 | GGAAGACGAAGTCTGAGCGA       | TGAGAAGGGTTTTGGGGATGG  |
| 46 | CAACGCGAACAATTCCCACT       | ATGGACGAGGAAAAGAGGTGT  |
| 47 | GCCATTGCCATAATGGAGGG       | GATCCCCTCGCAACCAACA    |
| 48 | TTGAAAAGAGATATCTGGTGGAGT   | AACCATCATTTAGGTGTTTGC  |
| 49 | TACTAAGTGTAAACCCTTGGGTTGTT | TGAAAGCCTCTCTGCTATGACC |
